# Supplementary material for: NiCo2S4 sub-micron spheres: an efficient non-precious metal bifunctional electrocatalyst
Source: Royal Society of Chemistry journal article supplement (doi:10.1039/c3nr05885a), 2014-01-01
Supplement: c3nr05885a.pdf [file c3nr05885a.pdf]

## Supplementary Information

### **NiCo<sub>2</sub>S<sub>4</sub> Sub-Micron Spheres: An Efficient Non-precious Metal Bifunctional Electrocatalyst**

Zhongyi Zhang,<sup>a, b</sup> Xiaogang Wang,<sup>a</sup> Guanglei Cui,<sup>a, \*</sup> Aihua Zhang,<sup>d</sup> Xinhong Zhou,<sup>c</sup> Hongxia Xu,<sup>a</sup> Lin Gu,<sup>d, \*</sup>

<sup>a</sup> The Qingdao Key Lab of solar energy utilization and energy storage technology, Qingdao Institute of Bioenergy and Bioprocess Technology, Chinese Academy of Sciences, Qingdao, 266101, P. R. China. Fax: 086-0532-80662746; Tel.: 086-0532-80662746; E-mail: cuigl@qibebt.ac.cn

<sup>b</sup> College of Chemistry and Chemical Engineering, Qingdao University, Qingdao, 266071, P. R. China.

<sup>c</sup> Qingdao University of Science and Technology, Qingdao, 266042, P. R. China.

<sup>d</sup> Beijing Laboratory for Electron Microscopy, Institute of Physics, Chinese Academy of Sciences, Beijing, 100190, P. R. China. E-mail: l.gu@iphy.ac.cn

## ■ Experimental Details

### Synthesis of NiCo<sub>2</sub>S<sub>4</sub> Sub-Micron Spheres (SMS)

In typical synthesis, 1 mmol Nickel(II) acetate tetrahydrate (C<sub>4</sub>H<sub>6</sub>NiO<sub>4</sub>·4H<sub>2</sub>O) and 2 mmol Cobalt(II) chloride hexahydrate (CoCl<sub>2</sub>·6H<sub>2</sub>O) were mixed with 1 mL 3-mercaptopropyl-1,2-propanediol in a 50 mL three-necked flask, followed by the addition of 20 mL oleyamine (OLA). The mixture was heated to 100 °C and continuously degassed for 30 min and then aerated with argon. After that, the solution was heated to 220 °C and kept for 120 min. Subsequently, the solution was cooled to room temperature and then an excess of ethanol was added. The formed precipitate was centrifuged and washed with ethanol for several times, subsequently vacuum-dried at 60 °C. Finally, the purified NiCo<sub>2</sub>S<sub>4</sub> sub-micron sphere was obtained.

### Physical Characterizations

Scanning electron microscope (SEM) images and energy dispersive spectra (EDS) were acquired using a Hitachi S-4800 field-emission electron microscope. High-resolution transmission electron microscopy (HRTEM) images were acquired using Hitachi H-7650 transmission electron microscopy. X-ray diffraction (XRD) measurements were carried out on a Bruker D8 ADVANCE X-ray diffractometer.

### Electrochemical Characterizations

Electrochemical experiments were performed in 0.1 M KOH aqueous using a CHI 440 electrochemical workstation (CHI Instruments Inc.). 5 mg NiCo<sub>2</sub>S<sub>4</sub> catalyst was dispersed in a mixture of 950 μL deionized water and 50 μL 5% Nafion solution to prepare a homogeneous ink, and a drop of 10 μL ink was put onto a glass-carbon disk electrode (GCDE, 3 mm diameter) or glassy-carbon rotation disk electrode (RDE, 3 mm diameter) and dried at room temperature, subsequently used as work electrodes. An Ag/AgCl (3 M KCl) electrode and a platinum flake were used as the reference electrode and counter electrode, respectively. For

comparison, commercial Pt/C catalyst (Pt 10 wt.% on carbon, Alfa Aesar) was tested using the same procedure. All potentials are reported relative to the Ag/AgCl (3 M KCl) reference electrode in this study.

The electron transfer number per oxygen molecule involved in the ORR electrocatalyzed by the NiCo<sub>2</sub>S<sub>4</sub> SMS is determined by the Koutecky-Levich equation given below.<sup>[1]</sup>

$$\frac{1}{j} = \frac{1}{j_k} + \frac{1}{B\omega^{0.5}} \quad (1)$$

Where  $j_k$  is the kinetic current and  $\omega$  is the electrode rotation speed. B could be determined from the slope of K-L plots (Fig. 5b) based on Levich equation as follows:<sup>[2]</sup>

$$B = 0.2nF(D_{O_2})^{2/3}\nu^{-1/6}C_{O_2} \quad (2)$$

Where n represents the number of electrons transferred per oxygen molecule, F is the Faraday constant ( $F=96485 \text{ C mol}^{-1}$ ),  $D_{O_2}$  is the diffusion coefficient of O<sub>2</sub> in 0.1 M KOH ( $1.9 \times 10^{-5} \text{ cm}^2 \text{ s}^{-1}$ ),  $\nu$  is the kinetic viscosity ( $0.01 \text{ cm}^2 \text{ s}^{-1}$ ), and  $C_{O_2}$  is the bulk concentration of O<sub>2</sub> in 0.1 M KOH ( $1.2 \times 10^{-6} \text{ mol cm}^{-3}$ ). The constant 0.2 is adopted when the rotation speed is expressed in rpm.<sup>[3]</sup>

## ■ Nitrogen Adsorption-desorption Test

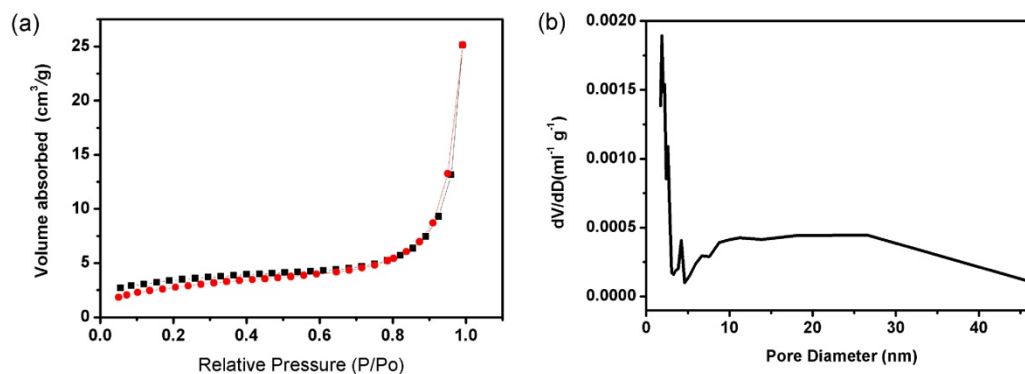

**Figure S1** (a) Nitrogen adsorption-desorption isotherms and (b) the pore-size distributions of NiCo<sub>2</sub>S<sub>4</sub> SMS.

Figure S1 shows the result of Nitrogen adsorption-desorption test for NiCo<sub>2</sub>S<sub>4</sub> SMS. The tested BET surface area of NiCo<sub>2</sub>S<sub>4</sub> SMS is 11.5 m<sup>2</sup>g<sup>-1</sup>. Figure S1b is the pore-size distributions curve, which is shown that the pore diameters of NiCo<sub>2</sub>S<sub>4</sub> SMS are primary at 10 nm to 40 nm. Desorption average pore diameter is calculated about 17.3 nm.

## Other Electrochemical Characterizations

### Electro-catalytic activities for ORR and OER

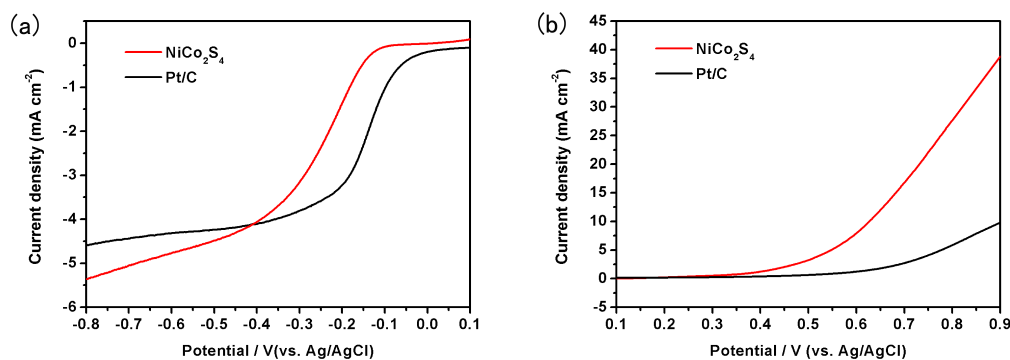

**Figure S2** The typical LSV curves for (a) ORR and (b) OER, which were tested on RDE in O<sub>2</sub>-saturated 0.1M KOH aqueous solution at 1600rpm with a sweep rate of 10 mVs<sup>-1</sup>.

**Table S1** Benchmarked ORR activities in 0.1 M KOH for Pt and other non-noble alternatives.

| Materials                                                           | Electrode <i>i</i><br>(mAcm <sup>-2</sup> ) | Loading<br>(mgcm <sup>-2</sup> ) | Mass <i>i</i><br>A g <sup>-1</sup> | Ref              |
|---------------------------------------------------------------------|---------------------------------------------|----------------------------------|------------------------------------|------------------|
| <b>Pt/C</b>                                                         | <b>~4.2</b>                                 | <b>0.7mg</b>                     | <b>6.0</b>                         | <b>This work</b> |
| Co <sub>0.50</sub> Mo <sub>0.50</sub> O <sub>y</sub> N <sub>z</sub> | ~4.3                                        | 0.7mg                            | 6.1                                | [4]              |
| <b>NiCo<sub>2</sub>S<sub>4</sub></b>                                | <b>~4.3</b>                                 | <b>0.7mg</b>                     | <b>6.1</b>                         | <b>This work</b> |
| LaNiO <sub>3</sub>                                                  | ~0.6                                        | 0.16mg                           | 3.8                                | [5]              |
| LaNiO <sub>3</sub> /C                                               | ~1.7                                        | 0.16mg                           | 10.6                               | [5]              |
| LaCu <sub>0.5</sub> Mn <sub>0.5</sub> O <sub>3</sub> /C             | ~2.5                                        | 0.16mg                           | 15.6                               | [5]              |

**Note:** All the ORR activities were tested on RDE at 1600rpm in O<sub>2</sub> saturated 0.1M KOH aqueous solution and corrected at 0.4 V overpotential.

**Table S2** Benchmarked OER activities in 0.1 M KOH for IrO<sub>2</sub> and other alternatives.

| Materials                                                                              | Electrode <i>i</i><br>(mAcm <sup>-2</sup> ) | Loading<br>(mgcm <sup>-2</sup> ) | Mass <i>i</i><br>A g <sup>-1</sup> | Ref              |
|----------------------------------------------------------------------------------------|---------------------------------------------|----------------------------------|------------------------------------|------------------|
| IrO <sub>2</sub>                                                                       | ~18                                         | 0.05mg                           | 360                                | [6,7]            |
| RuO <sub>2</sub>                                                                       | ~15                                         | 0.05mg                           | 300                                | [6,7]            |
| LaNiO <sub>3</sub>                                                                     | ~3.5                                        | 0.25mg                           | 14                                 | [7]              |
| La <sub>0.5</sub> Ca <sub>0.5</sub> CoO <sub>3</sub>                                   | ~3                                          | 0.25mg                           | 15                                 | [7]              |
| <b>NiCo<sub>2</sub>S<sub>4</sub></b>                                                   | <b>~22</b>                                  | <b>0.70mg</b>                    | <b>31</b>                          | <b>This work</b> |
| Ba <sub>0.5</sub> Sr <sub>0.5</sub> Co <sub>0.8</sub> Fe <sub>0.2</sub> O <sub>x</sub> | ~20                                         | 0.25mg                           | 80                                 | [7]              |

**Note:** All the OER activities were tested on RDE at 1600rpm in O<sub>2</sub> saturated 0.1M KOH aqueous solution and corrected at 0.4 V overpotential.

### Tafel curves of NiCo<sub>2</sub>S<sub>4</sub> SMS and Pt/C for ORR

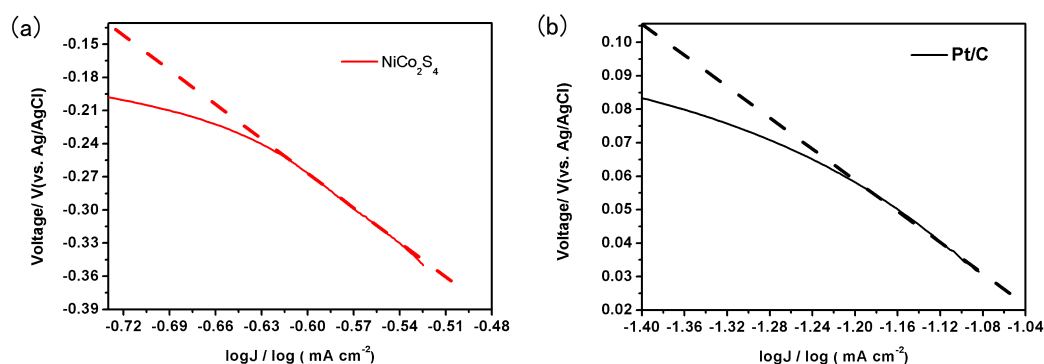

**Figure S3** Tafel curves of ORR for (a) NiCo<sub>2</sub>S<sub>4</sub> SMS and (b) Pt/C loading on glass carbon electrode in O<sub>2</sub>-saturated 0.1M KOH aqueous solution with a sweep rate of 10mVs<sup>-1</sup>.

The Tafel curves of NiCo<sub>2</sub>S<sub>4</sub> SMS and Pt/C catalysts for ORR were shown in Fig. S3. It is calculated that the exchange current density ( $J_0$ ) for NiCo<sub>2</sub>S<sub>4</sub> is around 0.19 mA cm<sup>-2</sup>. While, for Pt/C catalyst,  $J_0$  is at around 0.04 mA cm<sup>-2</sup>. The much larger  $J_0$  of NiCo<sub>2</sub>S<sub>4</sub> SMS implies a much higher intrinsic electrocatalytic activity for ORR compared with that of Pt/C catalyst.

## Chronoamperometric responses for ORR

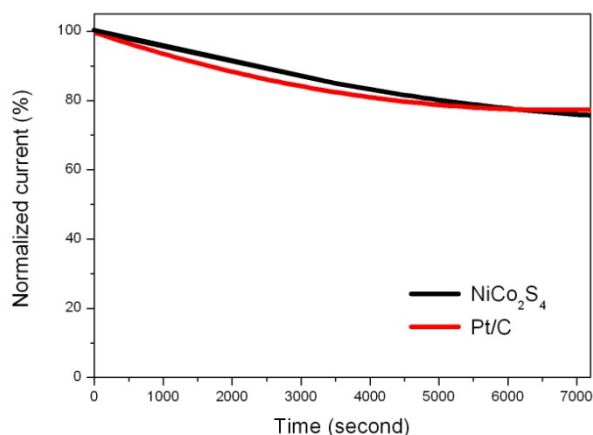

**Figure S4** Chronoamperometric responses (percentage of current retained versus operation time) of the NiCo<sub>2</sub>S<sub>4</sub> SMS and Pt/C electrocatalysts on glassy carbon electrode in O<sub>2</sub>-saturated 0.1 M KOH aqueous solution.

Figure S4 is the chronoamperometric responses of the NiCo<sub>2</sub>S<sub>4</sub> SMS and Pt/C electrocatalysts on glassy carbon electrode. As shown in Figure S4, the NiCo<sub>2</sub>S<sub>4</sub> electrocatalyst possesses similar stability compared with Pt/C electrocatalyst, which gives a 20% decrease in activity after 7000s of continuous operation.

### Tolerance to methanol oxidation in the cathodic reduction of Oxygen

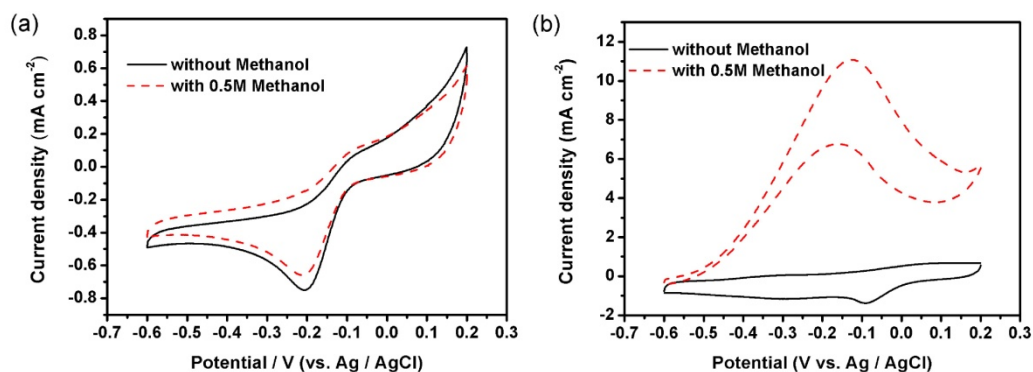

**Figure S5** (a) Cyclic voltammetry curves of the NiCo<sub>2</sub>S<sub>4</sub> electrocatalyst in O<sub>2</sub>-saturated 0.1 M KOH aqueous solution without methanol (black line) and with 0.5 M methanol (red dash line). (b) Cyclic voltammetry curves of the commercial Pt/C electrocatalyst in O<sub>2</sub>-saturated 0.1 M KOH electrolyte without methanol (black line) and with 0.5 M methanol (red line).

To examine the methanol tolerance of NiCo<sub>2</sub>S<sub>4</sub> SMS and Pt/C electrocatalyst, the CV curves in O<sub>2</sub>-saturated 0.1 M KOH aqueous solution with 0.5 M methanol versus the blank test (without methanol) were conducted as shown in Figure S5. In the case of NiCo<sub>2</sub>S<sub>4</sub> electrocatalyst, the onset potential and peak current density shows not much change at presence of 0.5 M methanol in solution (Figure S5a). However, for the Pt/C electrocatalyst, the superior strength methanol oxidation peaks appear in the solution contained 0.5 M methanol (Figure S5b). Therefore, NiCo<sub>2</sub>S<sub>4</sub> SMS possess high selectivity toward ORR with the advantage of methanol tolerance compared with the commercial Pt/C electrocatalyst.



## ■ Analysis of Electrocatalytic Mechanism

In order to better gain insight into the electrocatalytic mechanism of NiCo<sub>2</sub>S<sub>4</sub> SMS electrocatalyst for both ORR and OER, we resort to detailed analysis of the crystal and electronic structure of NiCo<sub>2</sub>S<sub>4</sub>. According to the previous investigation by X-ray and neutron diffraction,<sup>[8]</sup> NiCo<sub>2</sub>S<sub>4</sub> is indexed to a normal spinel type crystal structure, for which nickel occupies the tetrahedral sites (A-sites) and cobalt occupies the octahedral sites (B-sites). However, the cell edge of the thiocobaltites is about 9.4 Å, which is smaller than the anticipated value for purely ionic structures.<sup>[9]</sup> The small sulfur-sulfur distance endows the cobalt-sulfur bands with more covalent character and results in the low-spin state<sup>[2]</sup> of the d-electrons for Co(III) : t<sub>2g</sub><sup>6</sup> e<sub>g</sub><sup>0</sup>. Therefore, the σ\* bands associated with Co(III) is empty and any metallic conductivity is due to partially filled bands associated with the A-site of Ni(II) (Fig. S9) in the bulk phase of NiCo<sub>2</sub>S<sub>4</sub>, which occupies the center of tetrahedral field and presents high spin state t<sub>2g</sub><sup>4</sup> e<sub>g</sub><sup>4</sup>.

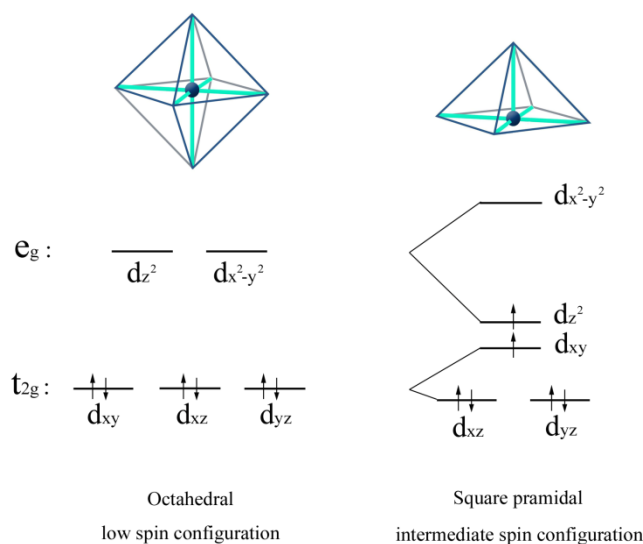

**Figure S6** Schematic representation of the energy levels and electronic configurations of d-electrons of Co(III) in bulk phase and on the surface of NiCo<sub>2</sub>S<sub>4</sub> crystal particle.

However, on the surface of NiCo<sub>2</sub>S<sub>4</sub> crystal particle, the d-electron configuration for Co(III) presents quite different situation from the bulk phase of NiCo<sub>2</sub>S<sub>4</sub> crystal particle. The anion

vacancy commonly observed on the surface results in further distortion from octahedral to square pyramidal field (Fig. S6) and exposition of  $e_g$ - $z^2$  orbit (Fig. S7a). Recent reports demonstrated that the surface of  $\text{CoO}_6$  octahedral presents the intermediate-spin  $\text{Co(III)}: t_{2g}^5 e_g^1$ , instead of the low-spin  $\text{Co(III)}: t_{2g}^6 e_g^0$  in bulk phase.<sup>[10]</sup> According to the crystal field theory and the Tsuchida's spectrochemical series,<sup>[11]</sup> the splitting energy ( $\Delta$ ) increases with the anion atomic radius reducing. The larger size  $\text{S}^{2-}$  anion of  $\text{CoS}_6$  spinel is much more conducive to this unique spin-state transformation (Fig. S6) compared with the  $\text{O}^{2-}$  anions of  $\text{CoO}_6$  spinel.

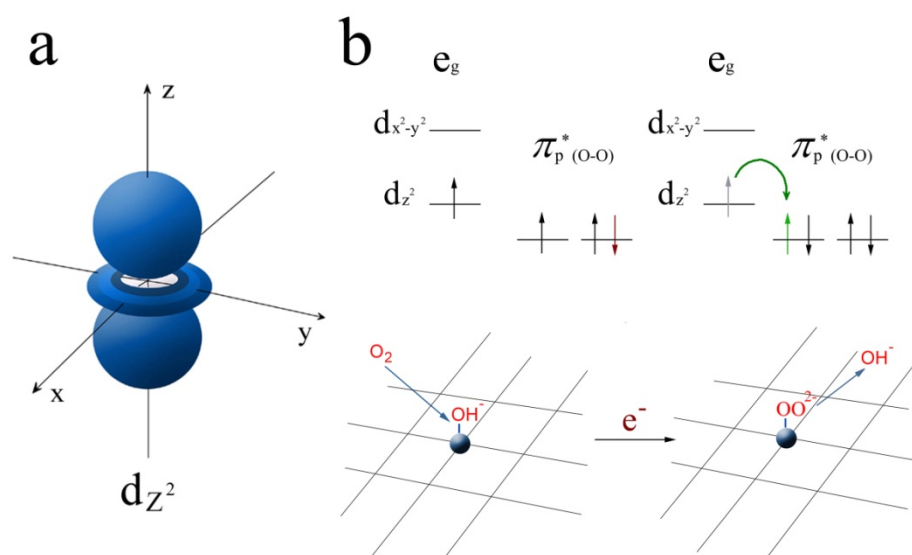

**Figure S7** Schematic representation of (a)  $d$ - $Z^2$  orbit of  $e_g$  energy level of  $\text{Co(III)}$  and (b) the  $\text{O}_2^{2-}/\text{OH}^-$  exchange corresponding to step 1 in ORR reaction.

More detailed calculation based on Jorgensen's approximate formula also supports this conclusion as follows:

## Theoretical calculations for the d electronic energy levels

According to Jorgensen's approximate formula:

$$10Dq = f(\text{ligand}) \times g(\text{metal})$$

The Tsuchida's spectrochemical series are as follows:

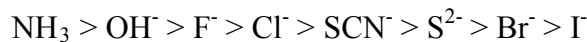

$$f(\text{S}^{2-}) \approx 0.73, g(\text{Co}^{3+}) \approx 18200 \text{ cm}^{-1}$$

For the sulfur-cobalt atom distance of  $\text{NiCo}_2\text{S}_4$  is much smaller than that in purely ionic structure,<sup>[9]</sup> the corrected 10Dq is as follows:

$$\begin{aligned} 10Dq &= f(\text{S}^{2-}) \times g(\text{Co}^{3+}) \times \left(\frac{R_c}{R_e}\right)^n \\ &= 18200 \times 0.73 \times \left(\frac{9.85}{9.39}\right)^5 \\ &= 16875 \text{ cm}^{-1} \end{aligned}$$

Where  $R_c = 9.85 \text{ \AA}$ <sup>[12]</sup> (calculated cell edge of thiospinel based on ionic  $\text{S}^{2-}$  without sulfur-sulfur interaction),  $R_e = 9.39 \text{ \AA}$  (the measured cell edge of  $\text{NiCo}_2\text{S}_4$ ),  $n = 5$ <sup>[13]</sup>, for free Co (III) pairing energy =  $21000 \text{ cm}^{-1}$ . However, for a particular complex, the pairing energy  $P = 146700 \text{ cm}^{-1}$ . Therefore, in the bulk phase of  $\text{NiCo}_2\text{S}_4$  for the octahedral  $\text{CoS}_6$ :

$$\Delta_o (16875 \text{ cm}^{-1}) > P (146700 \text{ cm}^{-1})$$

Thus, the electronic configuration of d-electrons exhibit low spin-state. While, on the surface of  $\text{NiCo}_2\text{S}_4$  for the square pyramidal  $\text{CoS}_6$ :

$$\begin{aligned} \Delta[dz^2 \sim dxy] &= \{0.86 - (0.86)\} \times Dq \\ &= 1.72Dq \\ &= 2903 \text{ cm}^{-1} \\ \Delta[dx^2 - y^2 \sim dyz] &= \{9.41 - (-4.57)\} \times Dq \\ &= 13.98Dq \\ &= 23591 \text{ cm}^{-1} \end{aligned}$$

Therefore,

$$\Delta(z^2 - xy) < P < \Delta\{(x^2 - y^2) - yz\}$$

Thus, the electronic configuration of d-electrons exhibit intermediate spin-state.

**Table S3** Relative energy level of d orbitals represented in Dq

| Field structure  | $d_{z^2}$ | $d_{x^2-y^2}$ | $d_{xy}$ | $d_{yz}$ | $d_{zx}$ |
|------------------|-----------|---------------|----------|----------|----------|
| Octahedral       | 6.00      | 6.00          | -4.00    | -4.00    | -4.00    |
| Square pyramidal | 0.86      | 9.14          | -0.86    | -4.57    | -4.57    |

Therefore, the surface Co(III) of CoS<sub>6</sub> spinel is presenting intermediate spin state Co(III):  $t_{2g}^5 e_g^1$ , despite the low-spin state Co(III):  $t_{2g}^6 e_g^0$  in bulk phase. The single electron in the  $e_g$  energy level selectively occupies the  $e_g-z^2$  orbit, which points to the surface sulfur vacancy and dominates the ORR and OER processes (Fig. S8). The importance of single electron for ORR and OER can be explained by the reported proposal of the competition between the  $O_2^{2-}/OH^-$  displacement and  $OH^-$  regeneration on the surface of metal ions in the alkaline solution.<sup>[14]</sup> Figure S10 exhibit the molecular orbital of oxygen, from which it can be seen that the HOMO was constructed by tow degenerated levels of  $\pi_{2p}^*$ . Fig. S7b schematically illustrates the  $O_2^{2-}/OH^-$  exchange process corresponding to step1 in ORR reaction (Fig. S8). If the  $e_g$  electron filling is more than one, the  $O_2^{2-}/OH^-$  exchange does not gain sufficient energy during the displacement process. If the  $e_g$  electron filling is less than one, the Co- $O^2$  is not sufficiently destabilized, and subsequently hinders  $OH^-$  regeneration, according to the previous literature.<sup>[15]</sup> Therefore, the B-site Co(III) as the catalytic center and A-site Ni(II) as the major contributor to electronic conductivity synergistically result in the high performance of NiCo<sub>2</sub>S<sub>4</sub> SMS.

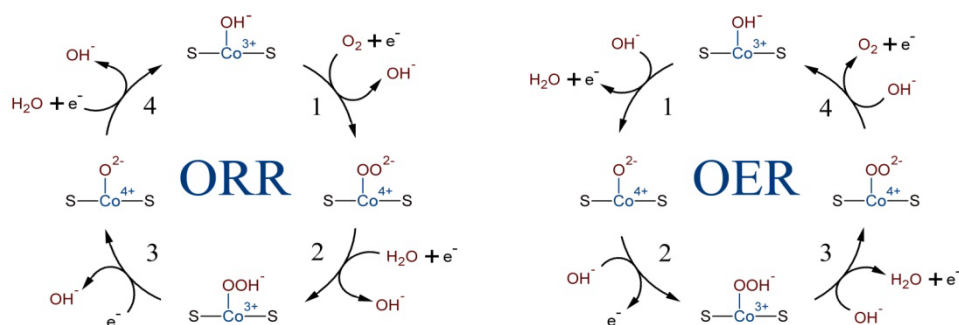

**Figure S8** Schematic illustrate of ORR and OER process.

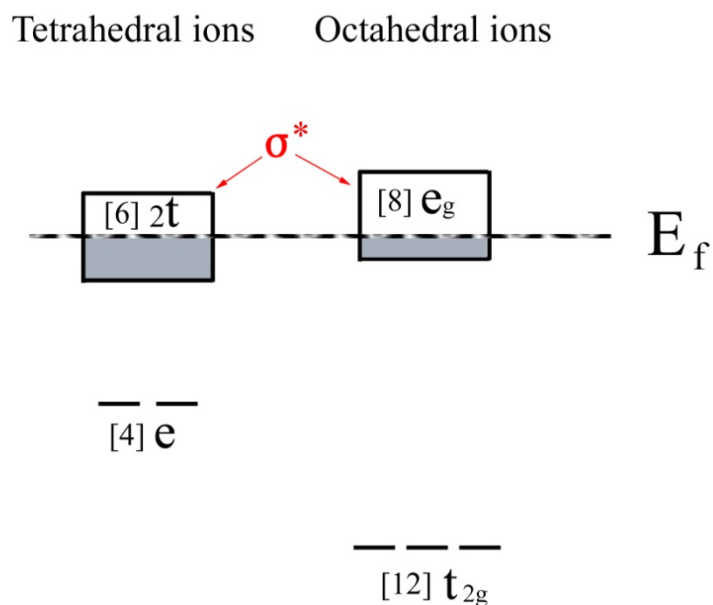

**Figure S9** Schematic single-molecule energy diagram for  $\text{NiCo}_2\text{S}_4$ .

In Figure S9, the number in brackets refers to the total degeneracy of a level. These are obtained by multiplying the number of orbital per atom contributing to a level or band by the number of atom per molecule.

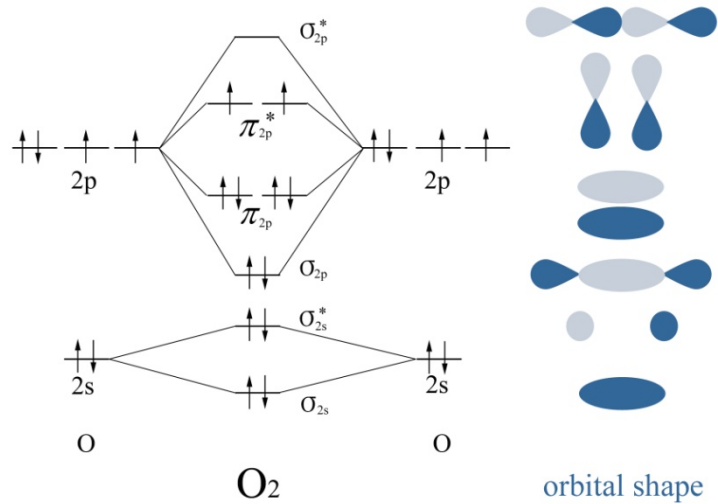

**Figure S10** The electronic configuration of the molecular orbital of  $O_2$ .

## ■ Reference

- 1 D. Yu, Q. Zhang, L. Dai, *J. Am. Chem. Soc.* **2010**, 132, 15127.
- 2 L. T. Qu, Y. Liu, J. B. Baek, L. M. Dai, *ACS Nano.* **2010**, 4, 1321.
- 3 S. Y. Wang, D. S. Yu, L. M. Dai, *J. Am. Chem. Soc.* **2011**, 133, 5182.
- 4 B. F. Cao, G. M. Veith, R. E. Diaz, J. Liu, E. A. Stach, R. R. Adzic, P. G. Khalifah, *Angew. Chem. Int. Ed.* 2013, 52, 10753.
- 5 J. Sunarso, A. A. J. Torriero, W. Zhou, P. C. Howlett, M. Forsyth, *J. Phys. Chem. C* **2012**, 116, 5827.
- 6 Y. M. Lee, J. Suntivich, K. J. May, E. E. Perry, S. H. Yang, *J. Phys. Chem. Lett.* **2012**, 3, 399.
- 7 J. Suntivich, K. J. May, H. A. Gasteiger, J. B. Goodenough, S. H. Yang, *Science* **2011**, 334, 1383.
- 8 O. Knop, K. I. G. Reid, Sutarno, Y. Nakagawa, *Can. J. Chem.* **1968**, 46, 3463.
- 9 A. Wold, K. Dwight, *Solid State Chemistry: Synthesis Structure, and Properties of Selected Oxide and Sulfides*, P222-228, Chapman and Hall; Softcover reprint of the original 1st ed. **1993**.
- 10 J. Q. Yan, J. S. Zhou, J. B. Goodenough, *Phys. Rev. B* **2004**, 70, 014402.
- 11 T. Ishii, S. Tsuboi, G. Sakane, M. Yamashita, B. K. Breedlove, *Dalton Trans.* **2009**, 680.
- 12 F. K. Lotgering, *Philips Res. Rep.* **1956**, 11, 218.
- 13 P. García-Fernández, J. M. García-Lastra, J. A. Aramburu, M. T. Barriuso, M. Moreno, *Chem Phys Lett.* **2006**, 426, 91.
- 14 J. B. Goodenough, B. L. Cushing, *Handbook of Fuel Cells-Fundamentals, Technology and Applications Vol. 2*, P520-533, eds Vielstich, W.; Gasteiger, H. A.; Yokokawa, H. (Wiley, **2003**).
- 15 Y. Y. Liang, Y. G. Li, H. L. Wang, J. Zhou, J. Wang, T. Regier, H. J. Dai, *Nat. Mater.* **2011**, 10, 780.
